# Supplementary material for: Exploring the inhibitory potential of Nigella sativa against dengue virus NS2B/NS3 protease and NS5 polymerase using computational approaches
Source: Royal Society of Chemistry journal article supplement (doi:10.1039/d3ra02613b), 2023-01-01
Supplement: d3ra02613b1.pdf [file d3ra02613b1.pdf]

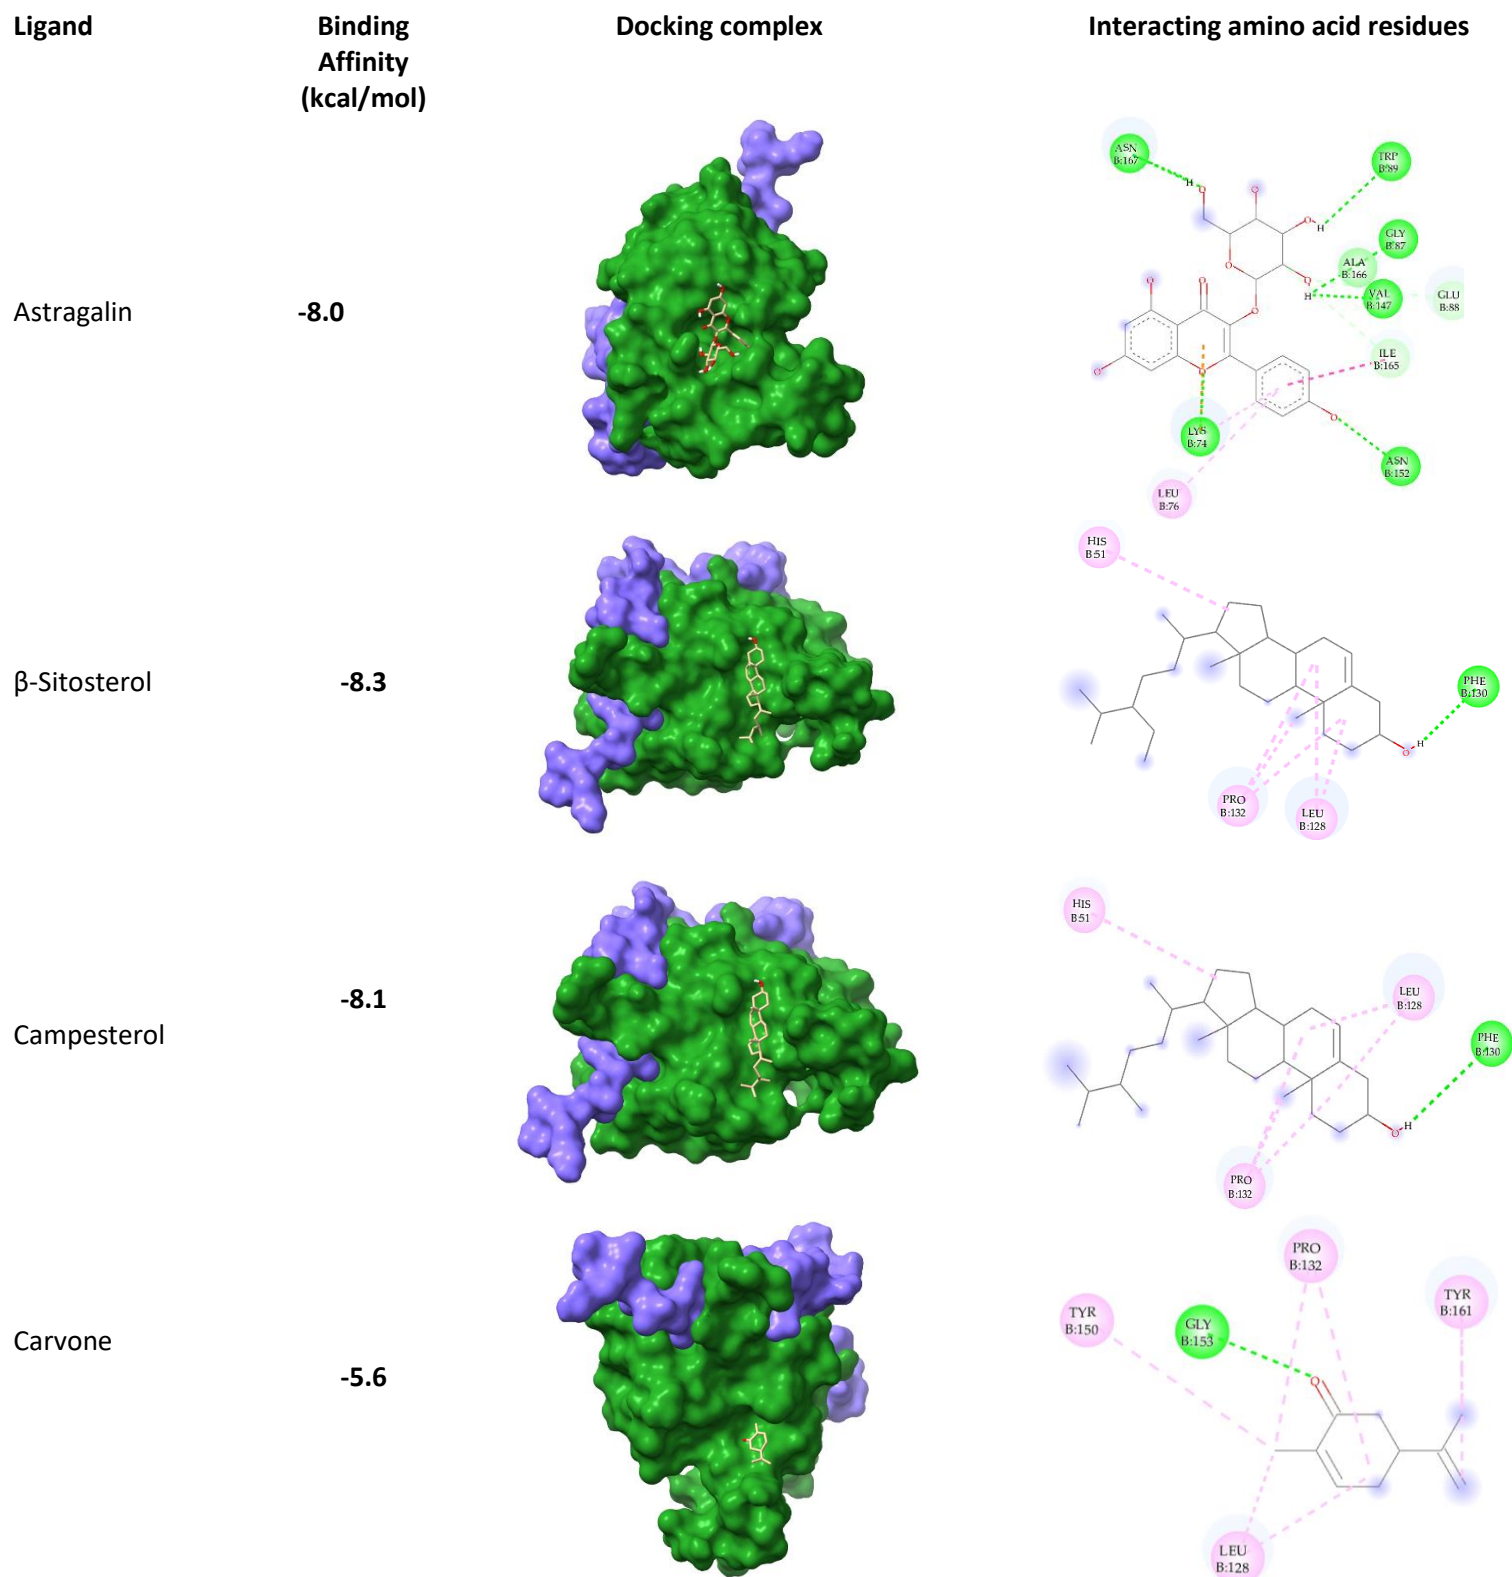

Cycloeucalenol

-8.3

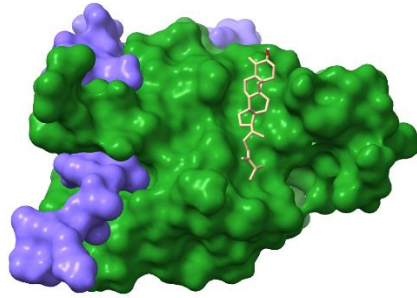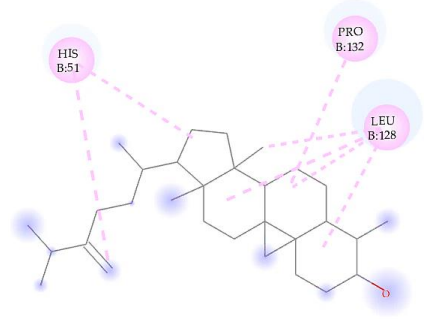

Dithymoquinone

-7.2

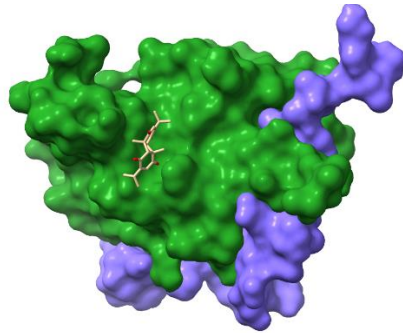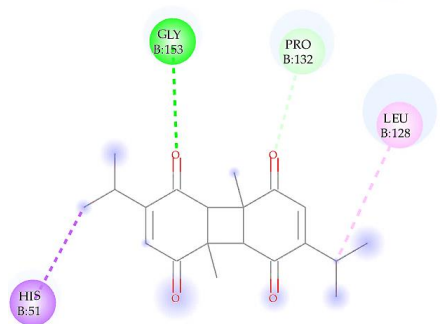

D-Limonene

-5.5

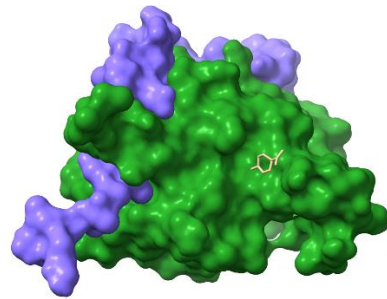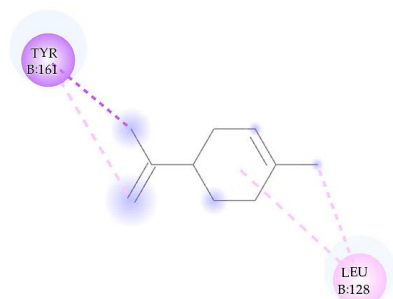

Nigellidine

-7.4

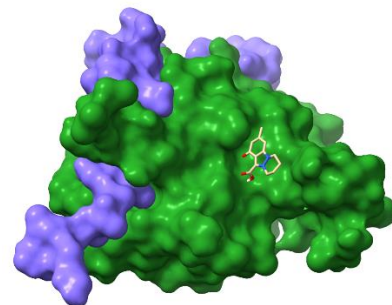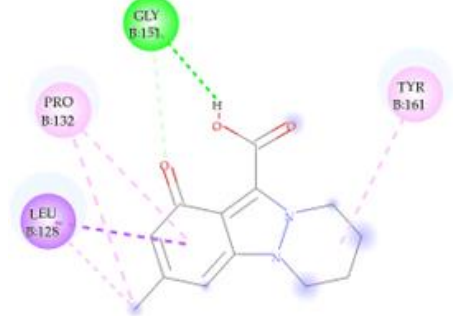

Nigellidine

-7.3

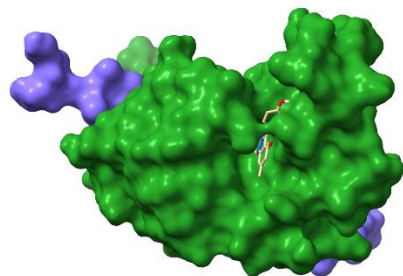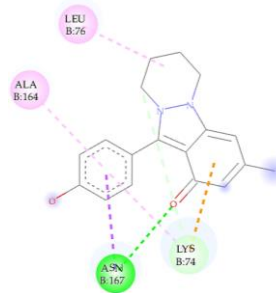

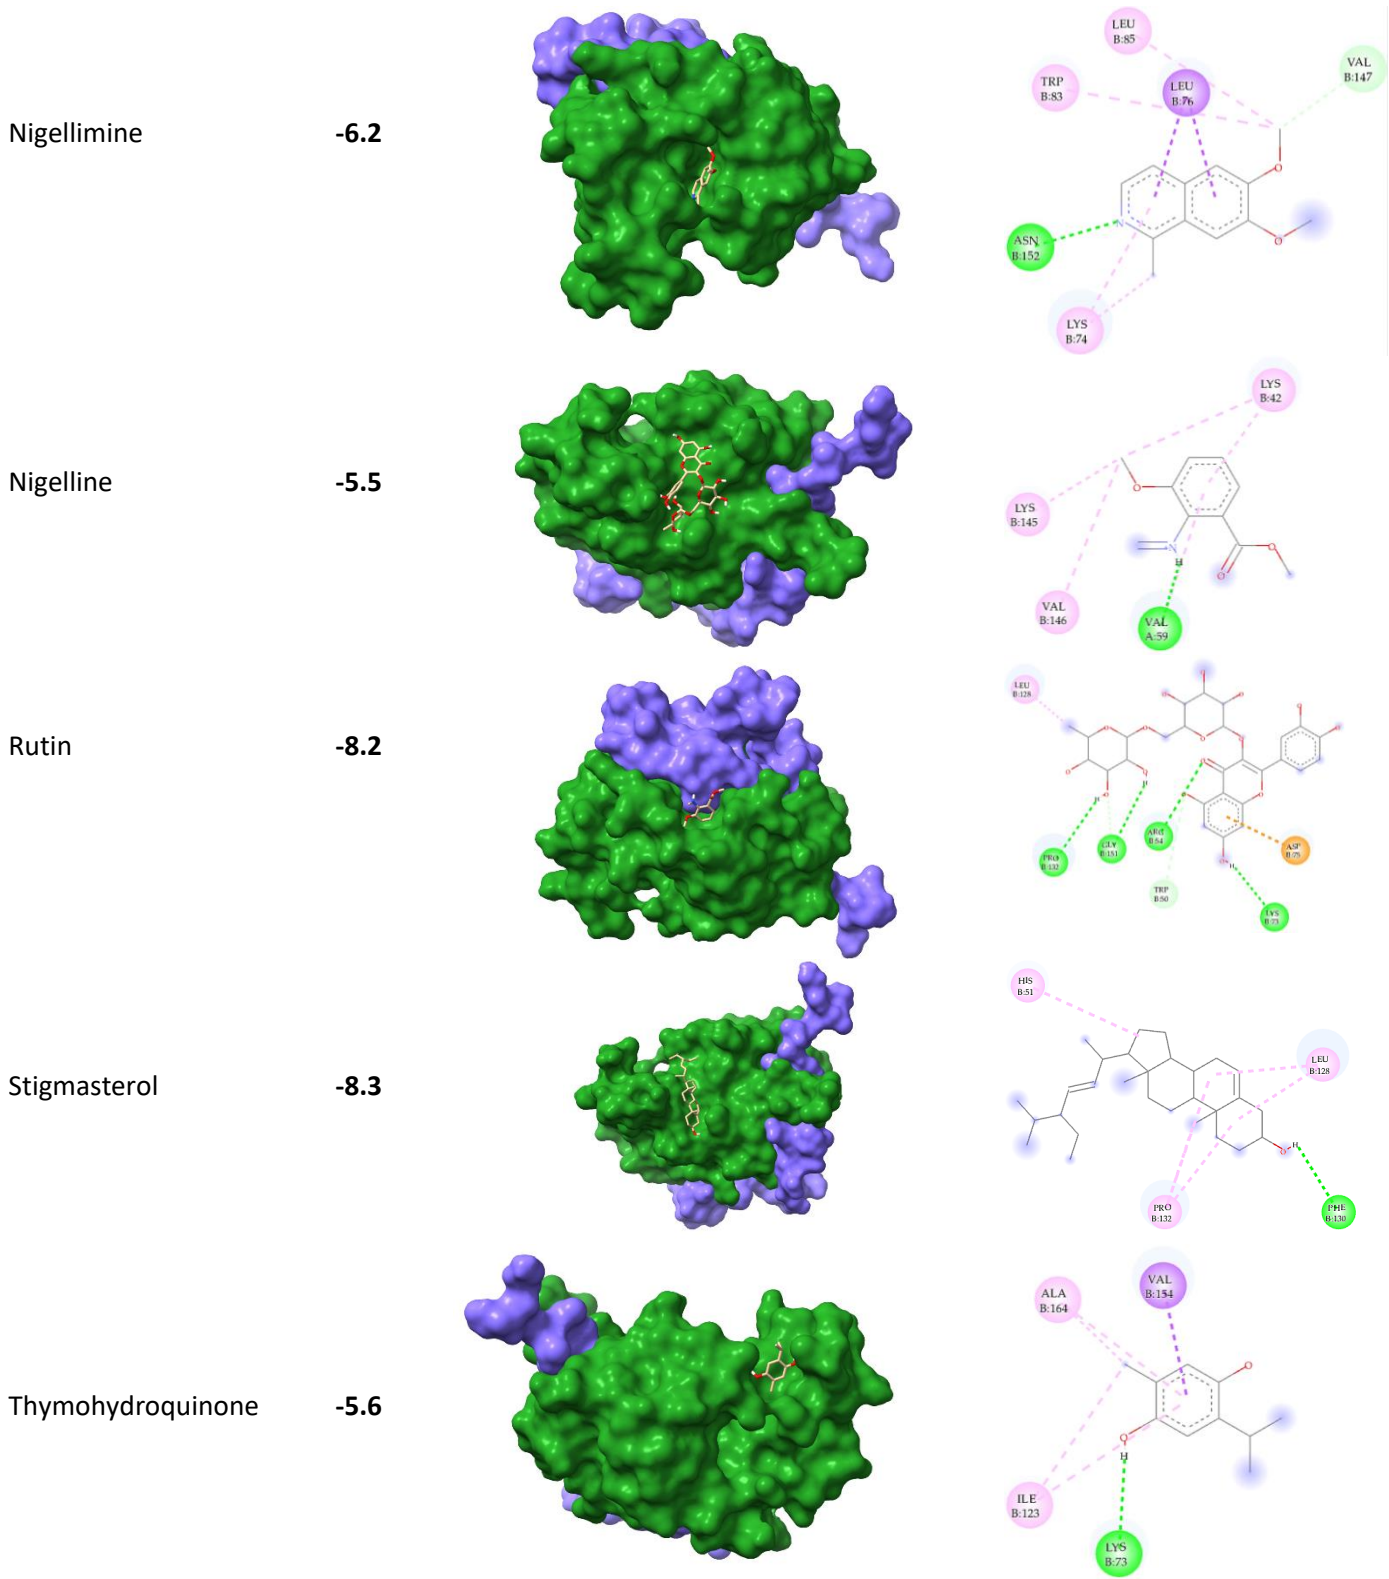

Thymoquinone

-5.6

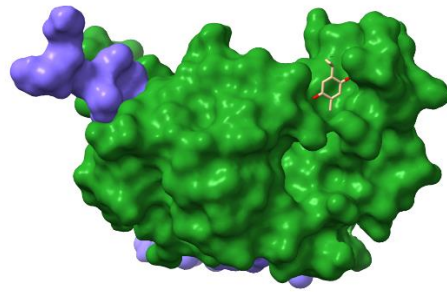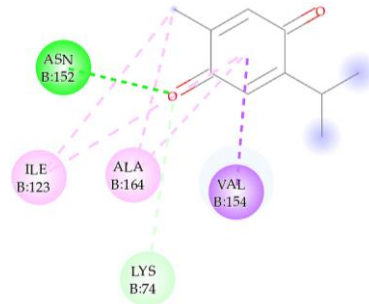

Curcumin (Positive control)

-7.2

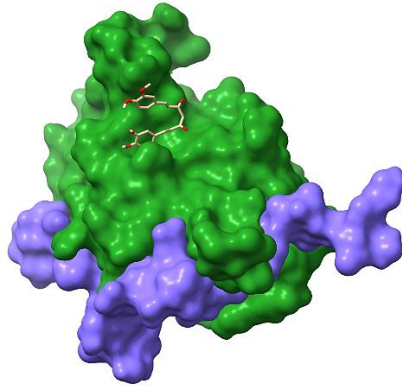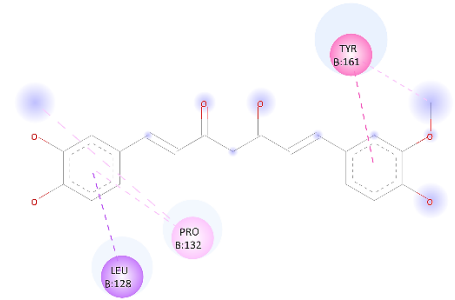

**Fig. 1** Docking poses of selected phytochemicals from *N. sativa* with Dengue virus NS2BNS3 protease represented as 3-D models (Left side) and their respective 2-D line models (Right side).



| Ligand | Binding Affinity (kcal/mol) | Docking Complex | Interacting amino acid residues |
|--------|-----------------------------|-----------------|---------------------------------|
|--------|-----------------------------|-----------------|---------------------------------|

Astragalin

-8.5

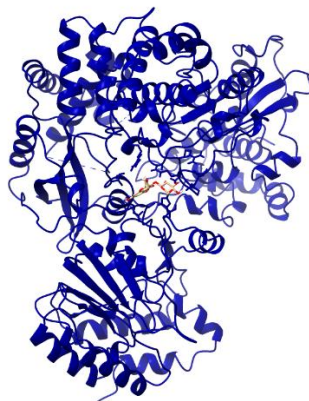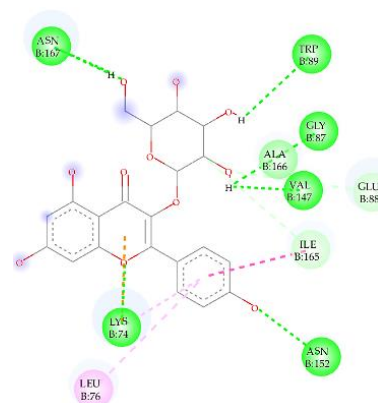

B-Sitosterol

-8.0

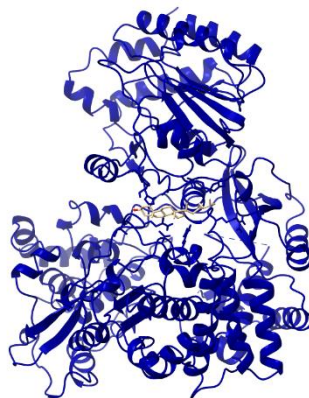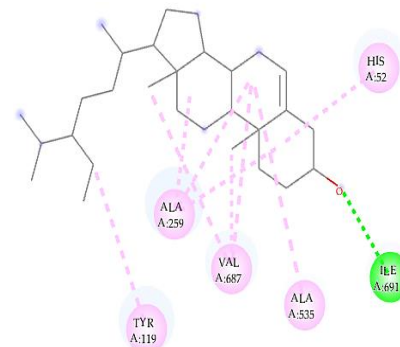

Campesterol

-8.5

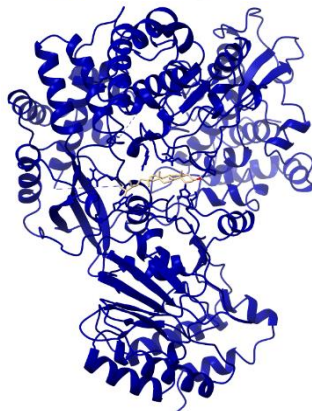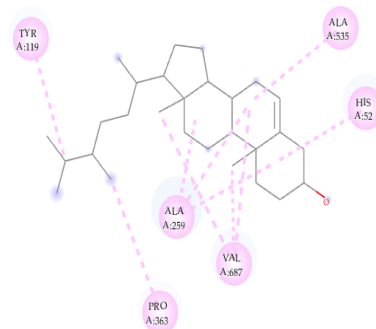

Carvone

-6.4

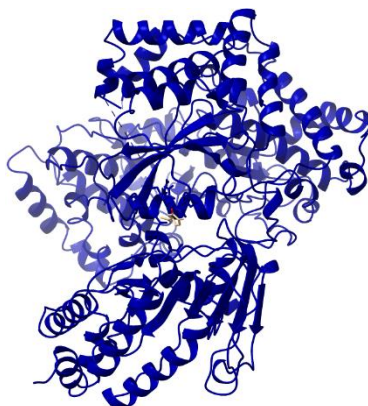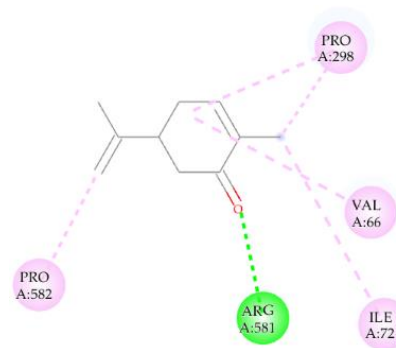

Cycloeucaleanol

-8.0

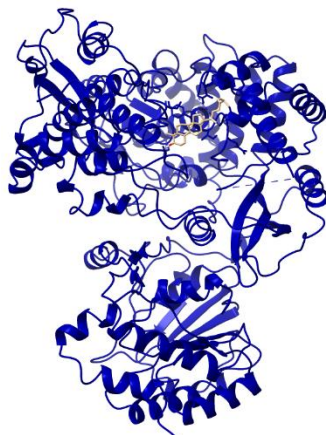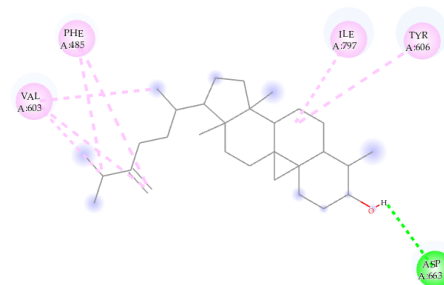

Dithymoquinone

-7.5

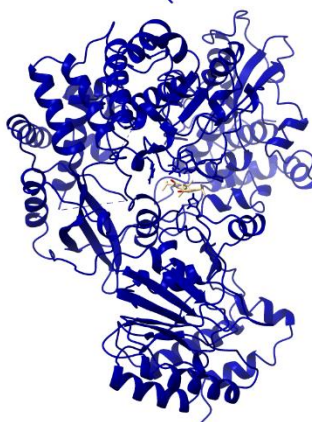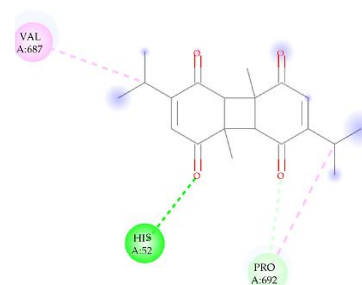

D-Limonene

-6.0

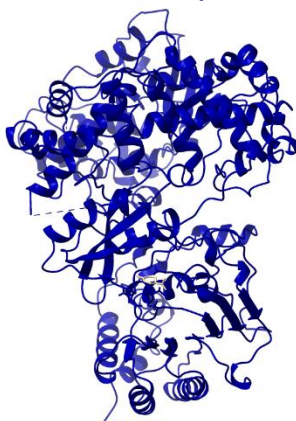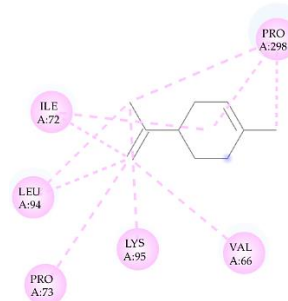

Isoquercetin -8.6

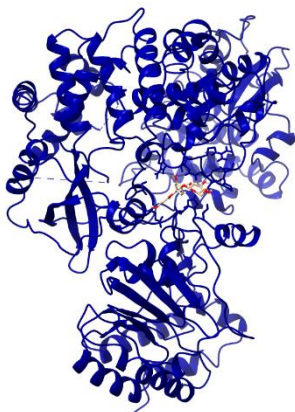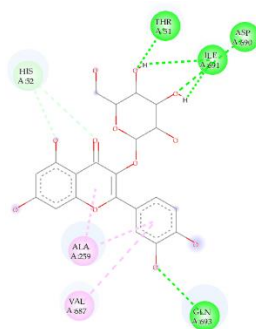

Nigellicine -9.1

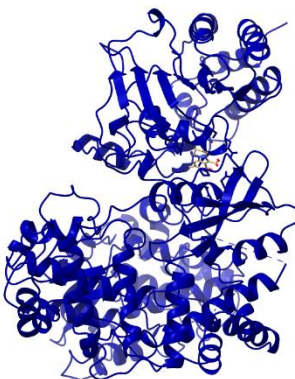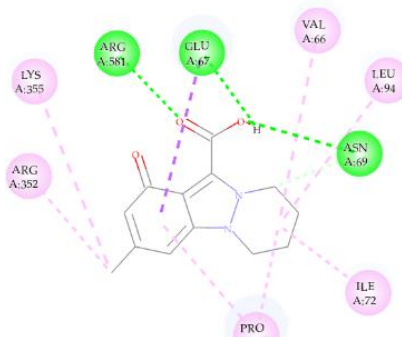

Nigellidine -8.4

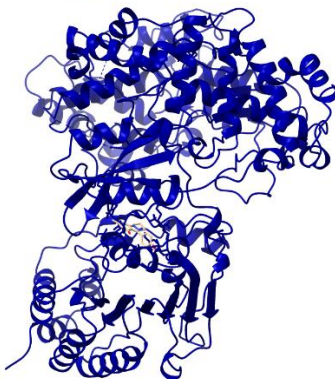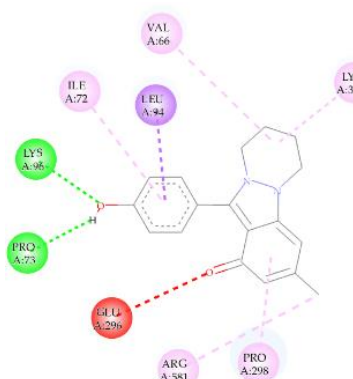

Nigellimine -6.1

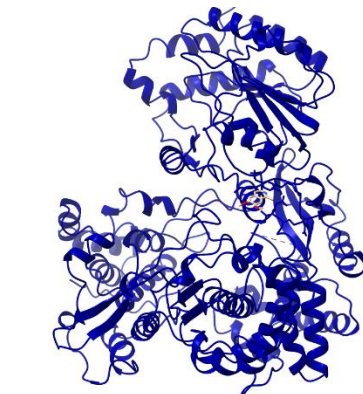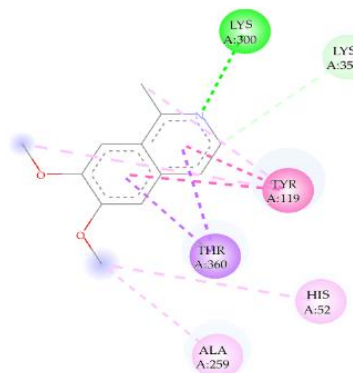

Nigelline

-6.2

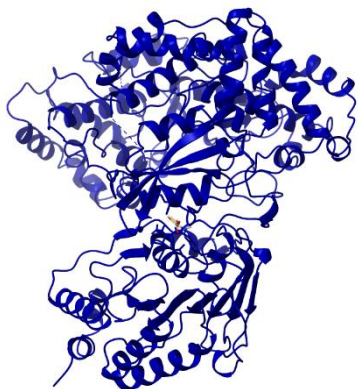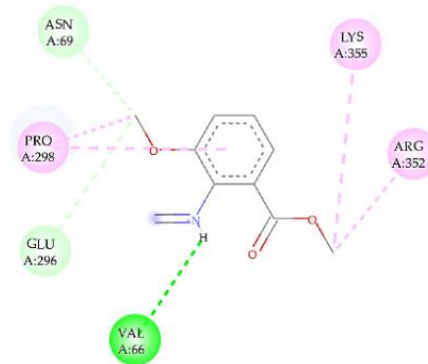

Stigmasterol

-8.8

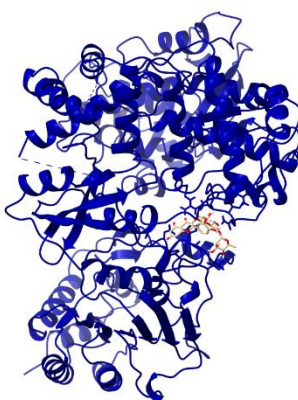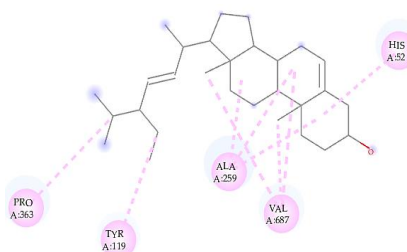

Thymohydroquinone

-6.5

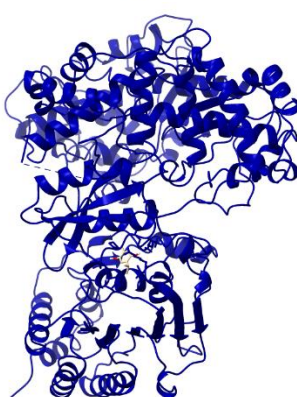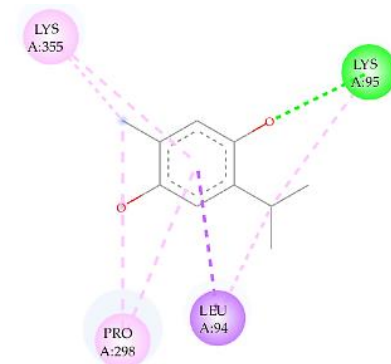

Thymoquinone

-6.7

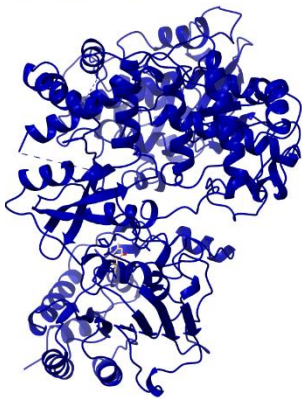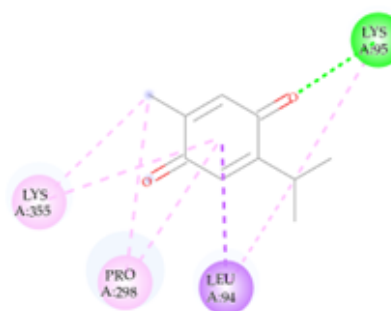



S-Adenosyl-L-  
Homocysteine (SAH)  
(Positive control)

-7.2

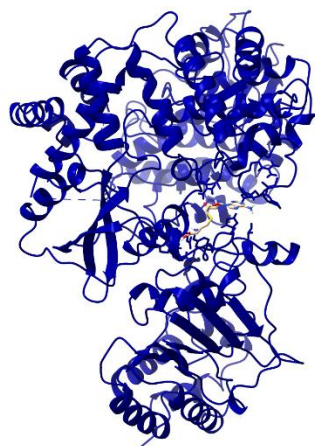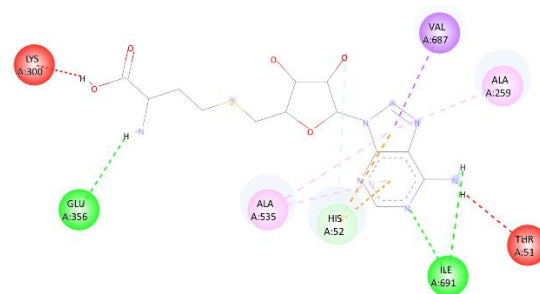

**Fig. 2** Docking poses of selected phytochemicals from *N. sativa* with Dengue virus NS5 polymerase represented as 3-D models (Left side) and their respective 2-D line models (Right side).
